# Supplementary material
Source: PubMed Central journal article supplement (PMC4149873)

Supplemental Figure 1. Additional analyses of proliferation, survival, myelination, and HIF/myelin gene expression, related to Figure 1.

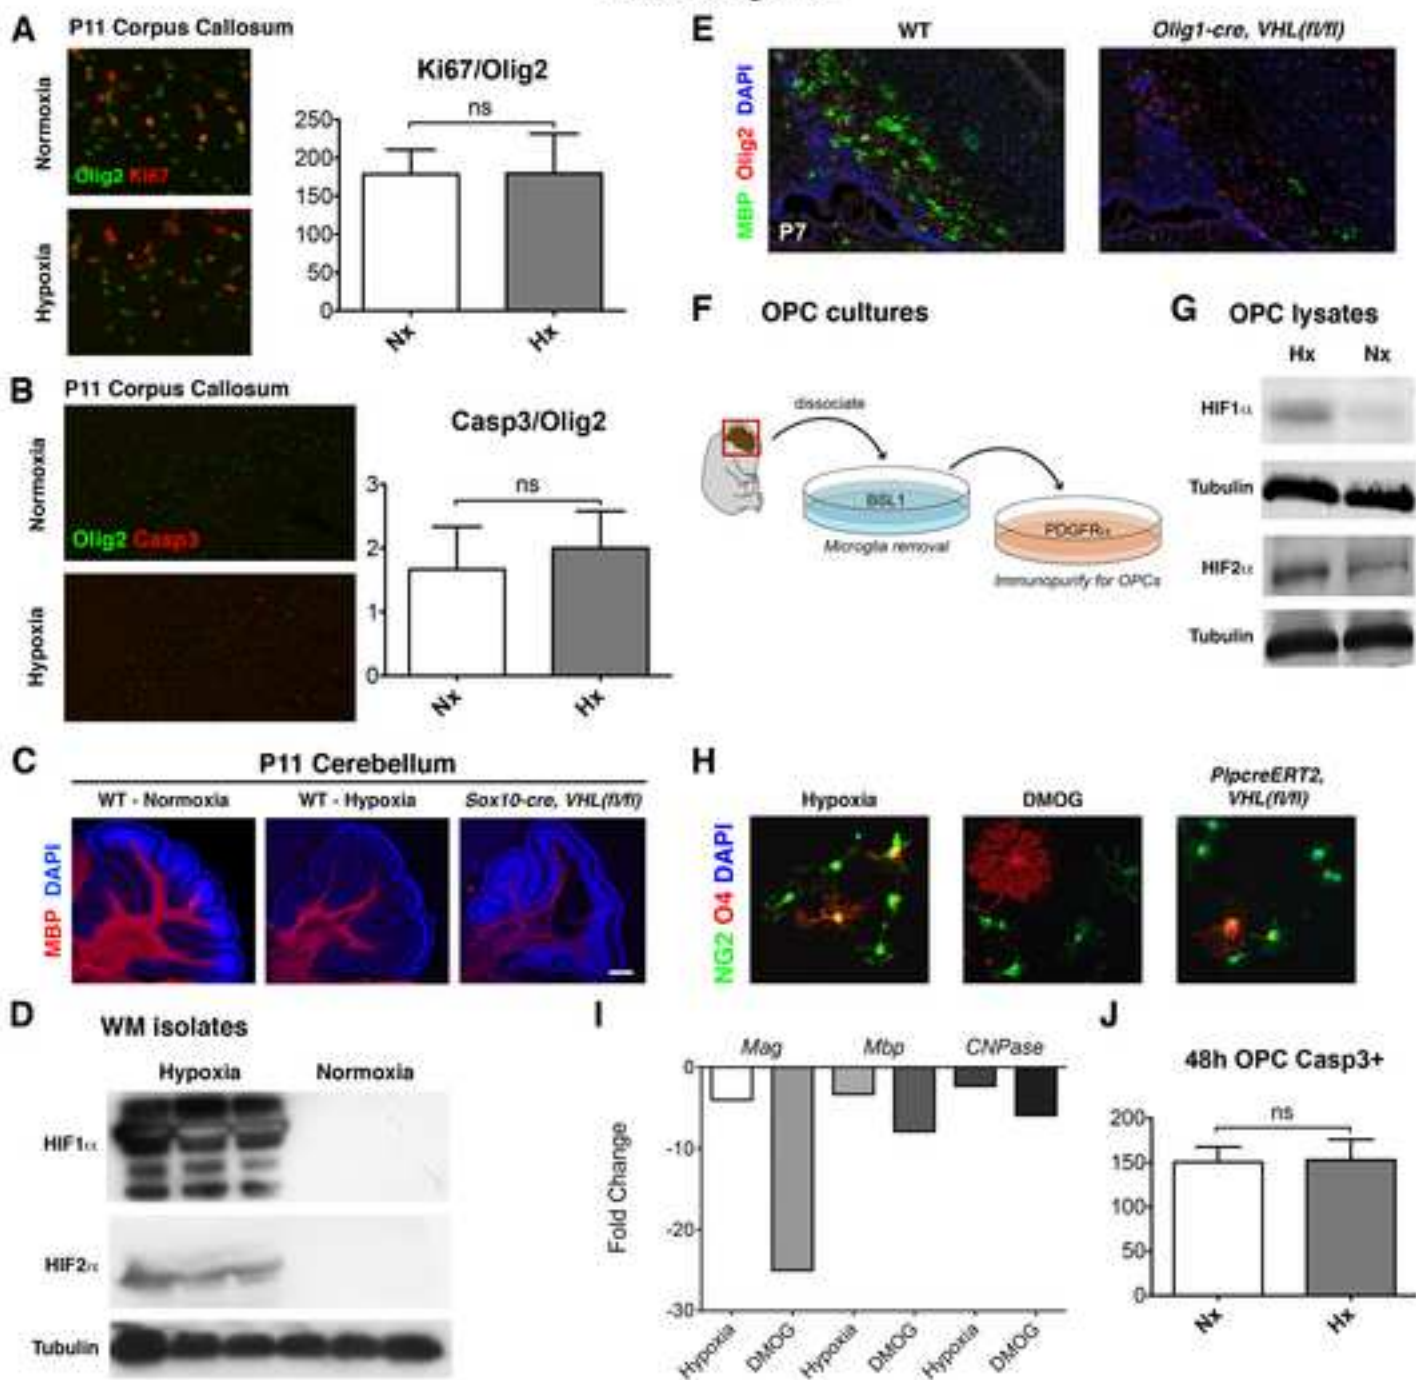

**Supplemental Figure 2. Additional analyses of survival, HIF expression and OPC differentiation block in cerebellar slice cultures, related to Figure 2.**

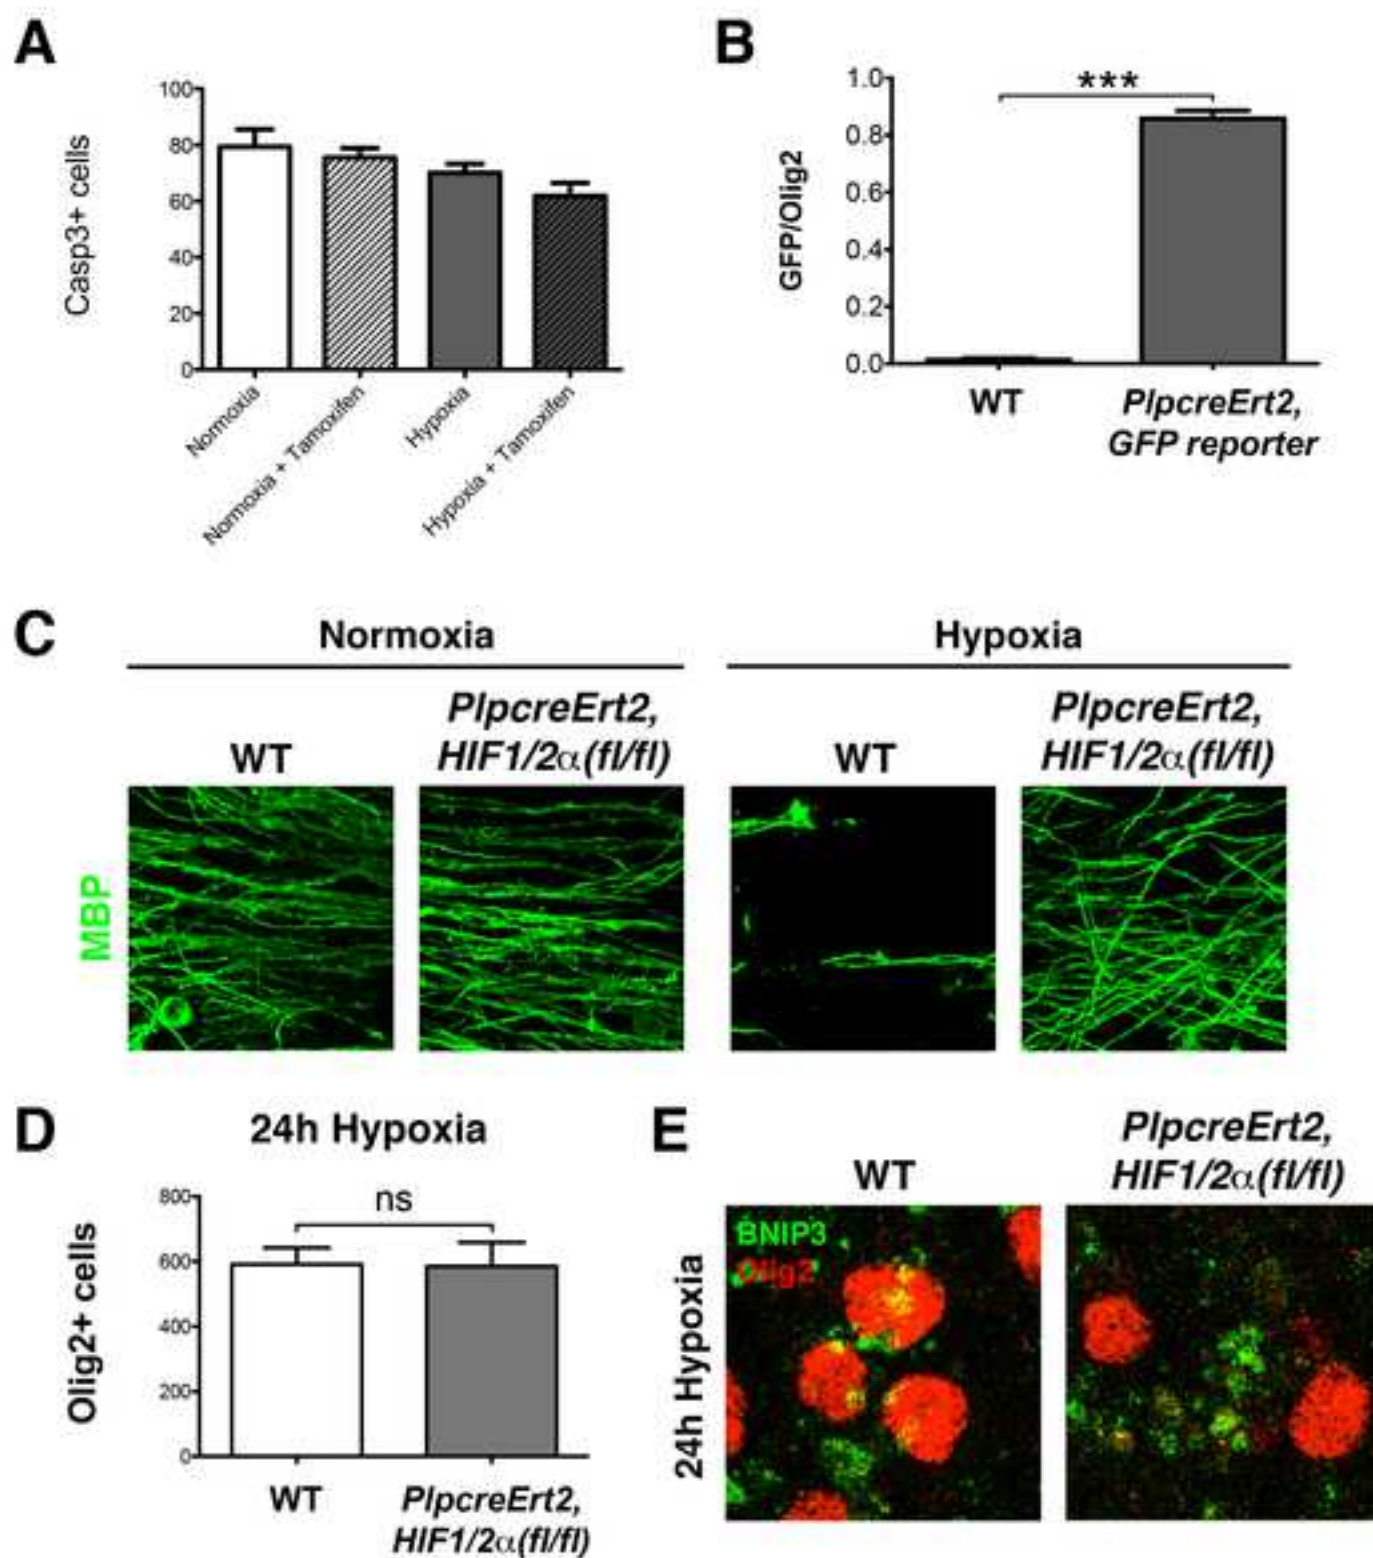

Supplemental Figure 3. Additional analyses of activation of canonical Wnt signaling upon HIF stabilization in OPCs, related to Figure 2.

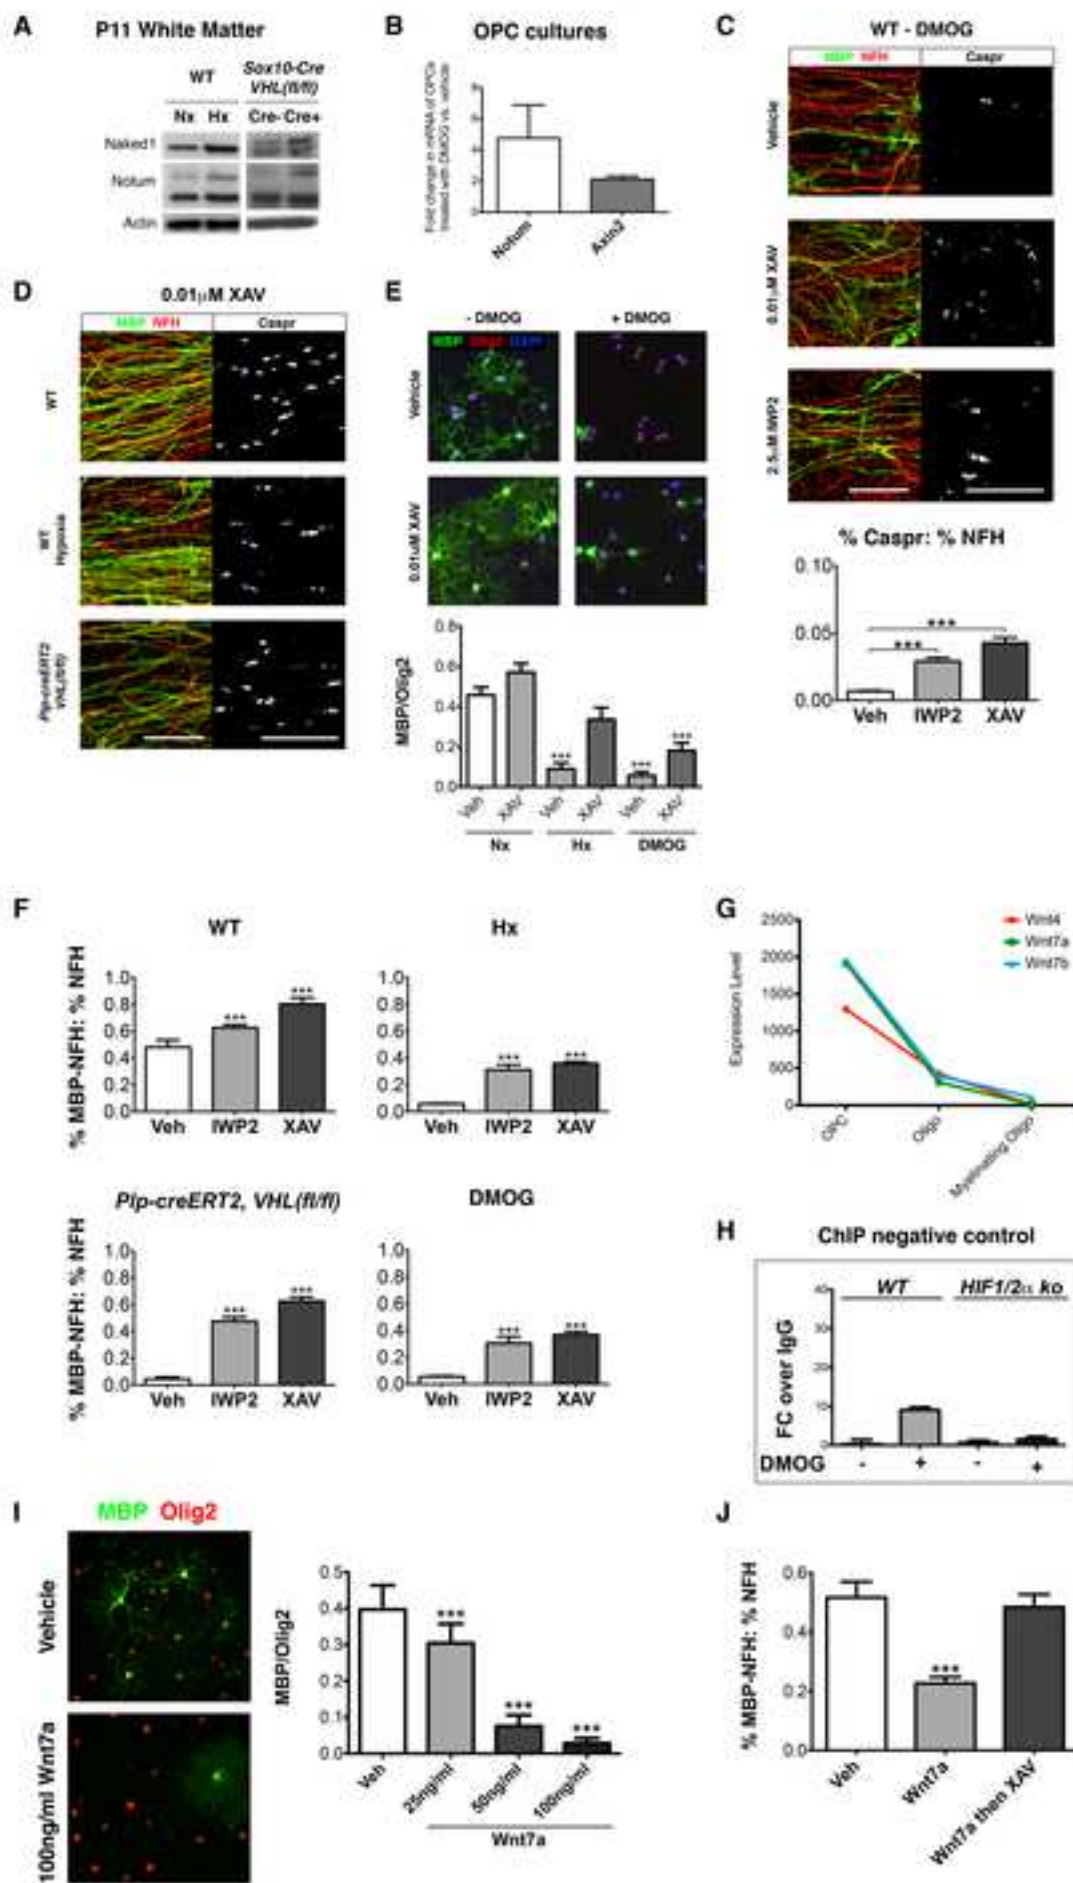

Supplemental Figure 4. Additional analyses and controls demonstrating *HIF* stabilization in OPCs promotes angiogenesis *in vivo*, related to Figure 4.

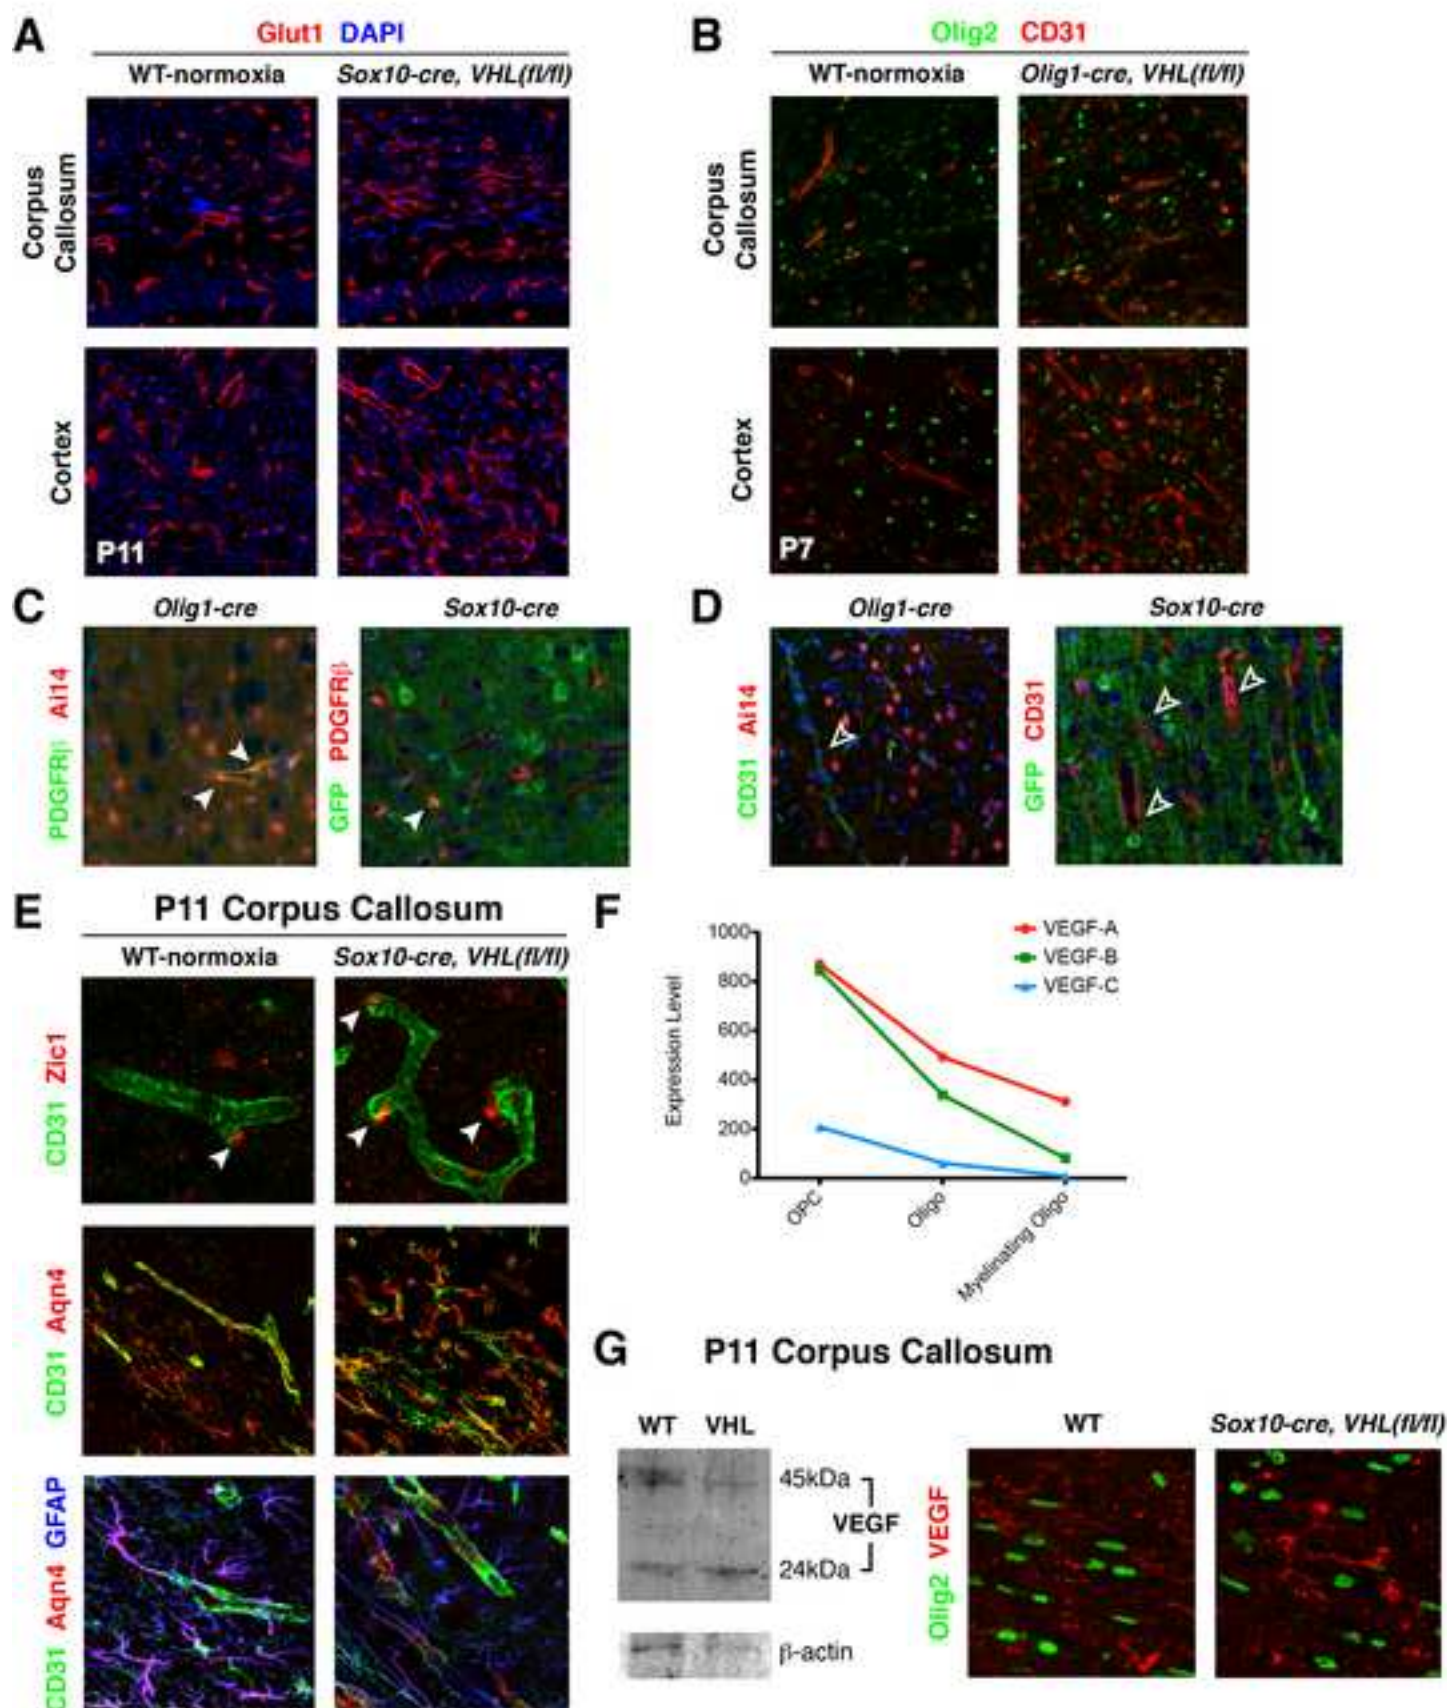

**Supplemental Figure 5. Additional analyses and controls demonstrating OPCs directly promote angiogenesis in a Wnt-dependent manner, related to Figure 5.**

**A Endo alone**

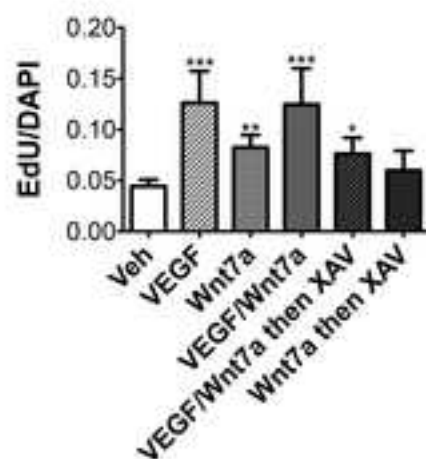

**B 24h**

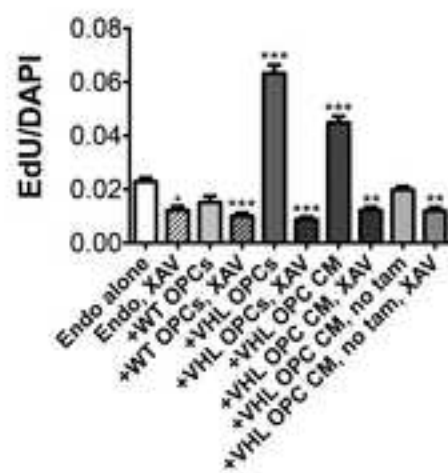

**C 48h**

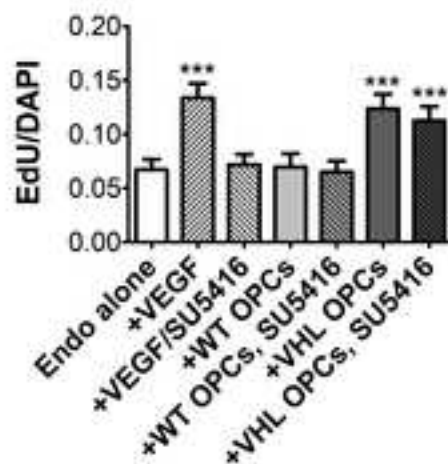

**Supplemental Figure 6. Additional analyses of phenotype of *Olig1-cre*, *HIF1/2 $\alpha$ (fl/fl)* mice, related to Figure 6.**

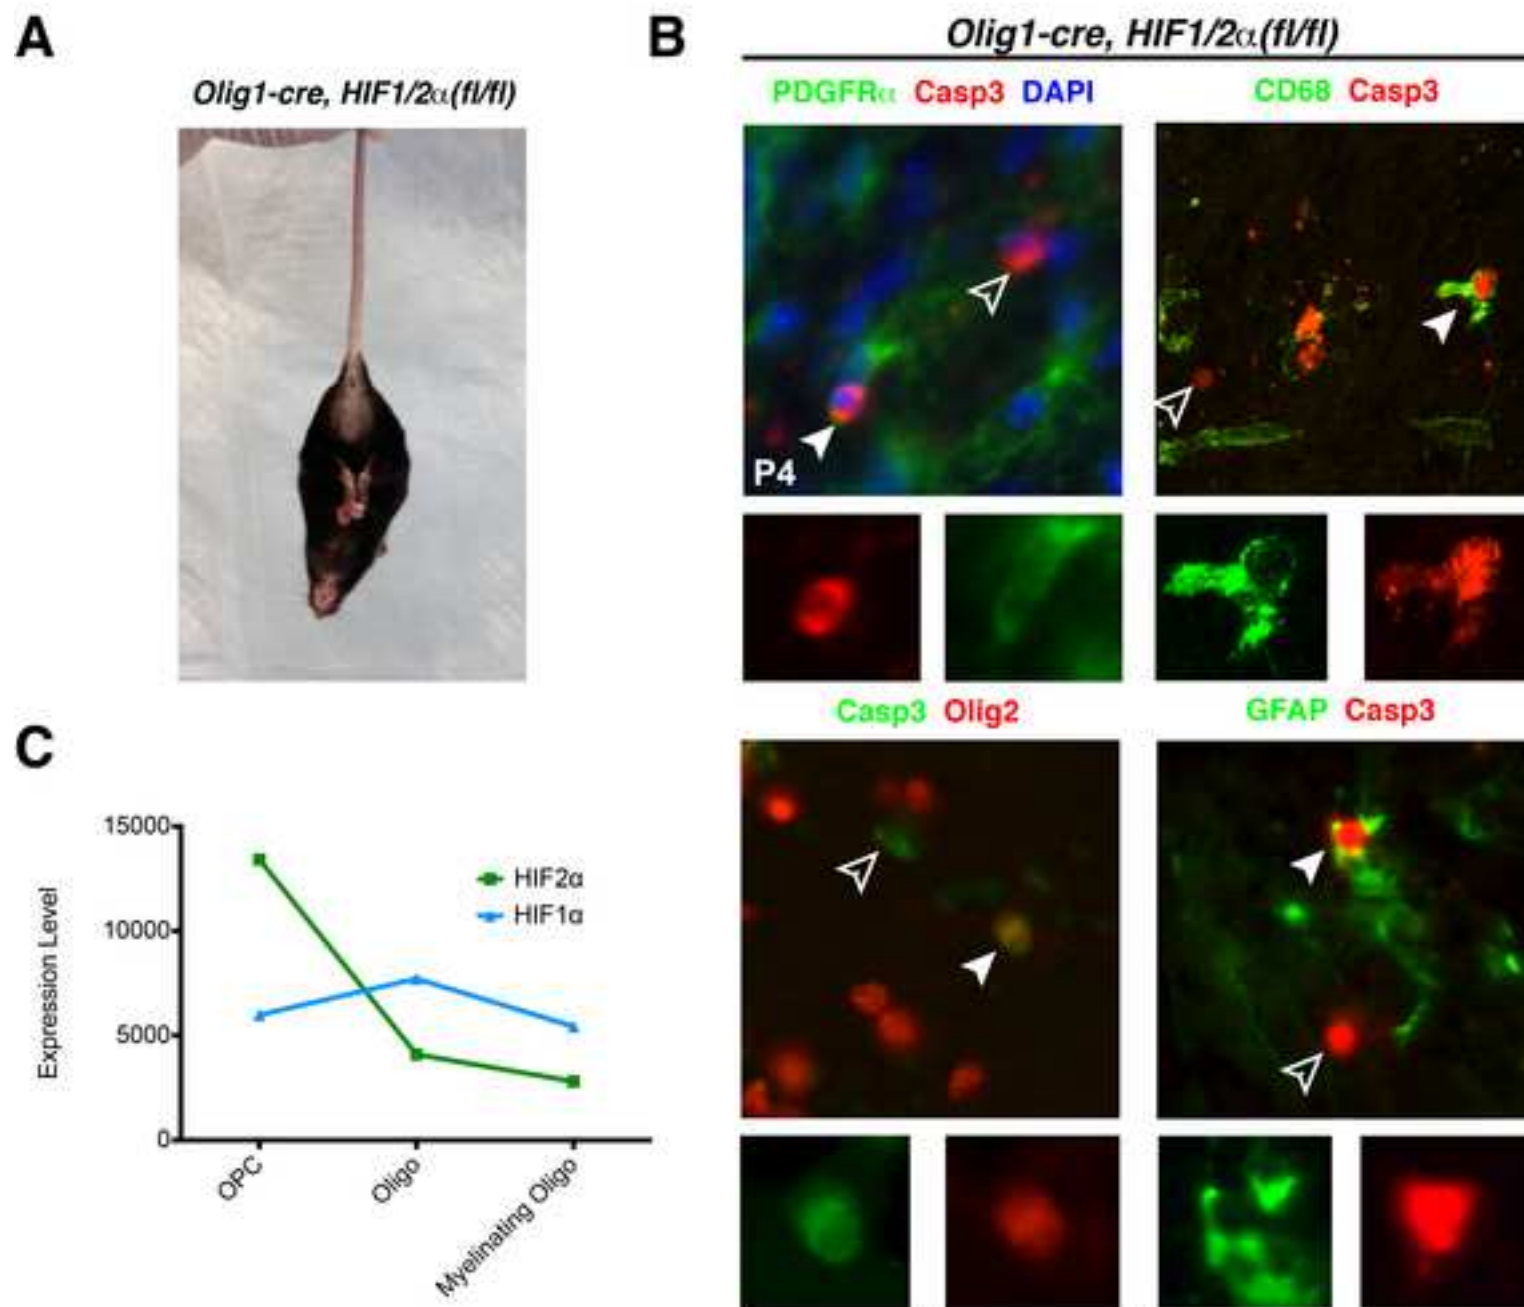

**Supplemental Figure 7. Model for cell-intrinsic for HIF signaling in synchronization of OPC differentiation, white matter angiogenesis, and myelination, related to Figure 7.**

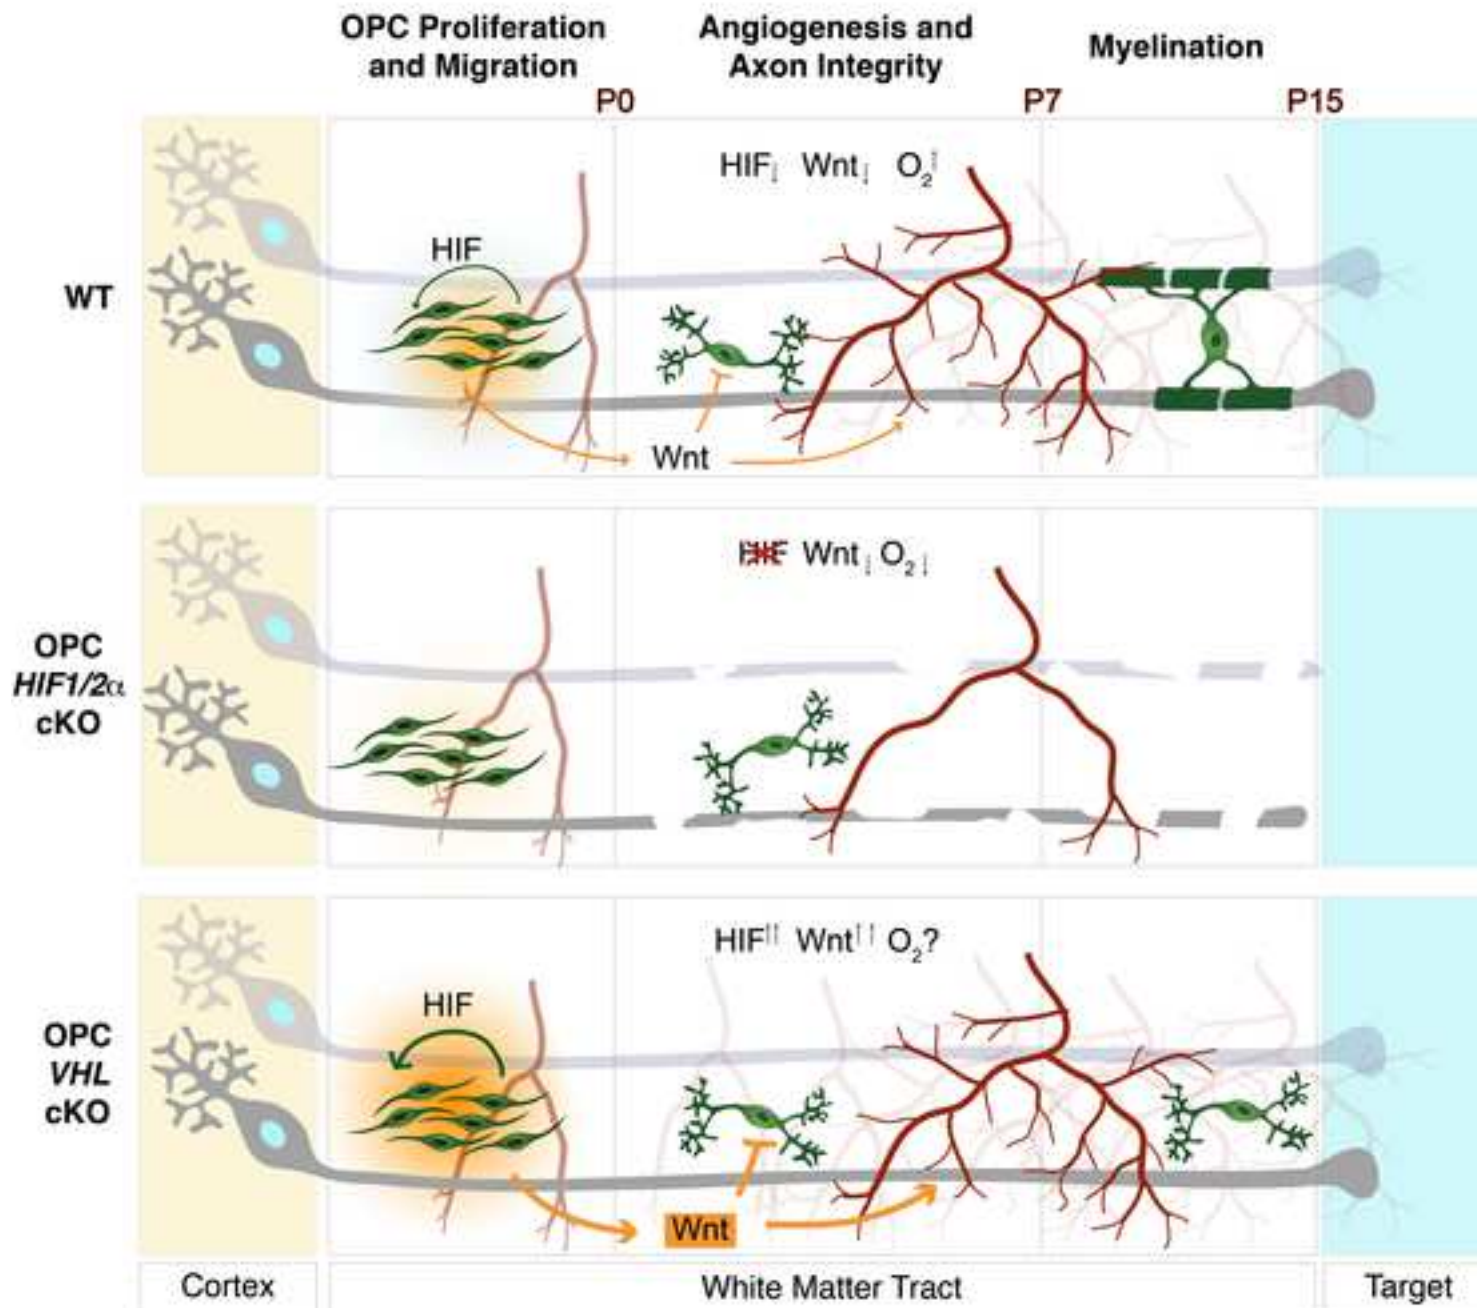

Supplement: NIHMS613401-supplement-02.pdf [file NIHMS613401-supplement-02.pdf]
